# Supplementary material
Source: Elsevier journal article supplement (https://www.sciencedirect.com/science/article/pii/S0300893220301317)
Supplement: mmc1 [file mmc1.pdf]

MATERIAL ADICIONAL

Tabla 1 del material adicional

Registro Español de Trasplante Cardiaco. Base de datos de trasplante cardiaco de adultos.

| <i>Datos del receptor</i>                 |                                 |                                       |
|-------------------------------------------|---------------------------------|---------------------------------------|
| N.º de trasplante y hospital              | Infección pretrasplante         | Asistencia ventricular y localización |
| N.º de historia clínica e iniciales       | Diabetes mellitus               | Cirugía cardiaca previa               |
| Fecha del trasplante                      | Patrón obstructivo respiratorio | Portador de desfibrilador             |
| Fecha de nacimiento, edad y sexo          | HTA, hiperuricemia              | Portador de resincronizador           |
| Grupo sanguíneo y Rh                      | Hipercolesterolemia             | Tratamiento con amiodarona            |
| Peso y talla                              | Hipertrigliceridemia            | HLA                                   |
| Índice de masa corporal                   | Serología para hepatitis B y C  | Anticuerpos citotóxicos               |
| Enfermedad de base                        | Serología para CMV              | Técnica de detección                  |
| Tratamiento inotropeo                     | Serología para Epstein-Barr     | Situación en trasplante FEVI          |
| Creatinina                                | Serología para toxoplasma       | Tumor pretrasplante y fecha           |
| Cateterismo derecho y valores bilirrubina | Mantoux                         | Tumor, topografía/localización        |
| GOT (ASAT)                                | Enfermedad vascular periférica  |                                       |
| GPT (ALAT)                                | Ventilación mecánica            |                                       |
|                                           | Asistencia circulatoria         |                                       |
| <i>Datos del donante</i>                  |                                 |                                       |
| Edad y sexo                               | Serología para hepatitis B y C  | Días de estancia en UCI               |
| Procedencia                               | Serología para CMV              | Dopamina y dobutamina                 |
| Grupo sanguíneo y Rh                      | Serología para Epstein-Barr     | Causa de muerte                       |
| Peso y talla                              |                                 | Ecocardiografía                       |
|                                           |                                 | HLA                                   |

|                                                                                                                                                                                    |                                                                                                                                                        |                                                                                                                                                                                                                          |
|------------------------------------------------------------------------------------------------------------------------------------------------------------------------------------|--------------------------------------------------------------------------------------------------------------------------------------------------------|--------------------------------------------------------------------------------------------------------------------------------------------------------------------------------------------------------------------------|
| Índice de masa corporal                                                                                                                                                            | Serología para toxoplasma<br>PCR e hipotensión arterial                                                                                                |                                                                                                                                                                                                                          |
| <i>Datos quirúrgicos</i>                                                                                                                                                           |                                                                                                                                                        |                                                                                                                                                                                                                          |
| Tiempo de isquemia<br>Código del trasplante<br>Tiempo quirúrgico                                                                                                                   | Tipo de trasplante<br>¿Otro trasplante en el mismo acto?, ¿cuál?                                                                                       | Técnica quirúrgica<br>Tipo de cardioplejía<br>¿Retrasplante?                                                                                                                                                             |
| <i>Datos de seguimiento: inmunosupresión, infección viral</i>                                                                                                                      |                                                                                                                                                        |                                                                                                                                                                                                                          |
| Tratamiento de inducción y días<br>Fármacos inmunosupresores al inicio (ciclosporina, tacrolimus, azatioprina, micofenolato mofetilo, micofenolato sódico, rapamicina, everolimus) | Fármacos inmunosupresores de mantenimiento (ciclosporina, tacrolimus, azatioprina, micofenolato mofetilo, micofenolato sódico, rapamicina, everolimus) | Profilaxis infecciosas antivirales y tiempo<br>Infección por CMV (órgano afecto, número de infecciones, tratamiento de la infección y síntomas)                                                                          |
| <i>Datos de seguimiento: rechazo, EVI, otras infecciones, complicaciones y supervivencia</i>                                                                                       |                                                                                                                                                        |                                                                                                                                                                                                                          |
| Fallo primario del injerto<br>Tiempo de intubación (h)<br>Días en reanimación/UCI<br>Número de episodios de rechazo                                                                | FEVI<br>Número de infecciones que requieran ingreso y germen<br>Fecha de la primera infección<br>Germen causante de la primera infección               | Necesidad de marcapasos definitivo<br>Hiperuricemia<br>Hipercolesterolemia<br>Hipertrigliceridemia<br>Desarrollo de bloqueo de rama<br>Creatinina en la revisión<br>Creatinina el primer mes<br>Creatinina el primer año |

|                                                                               |                                      |                                         |
|-------------------------------------------------------------------------------|--------------------------------------|-----------------------------------------|
| Fecha y número de rechazos el primer año                                      | Localización de la primera infección | Creatinina el quinto año                |
| Número de rechazos resistentes a corticoides                                  | Número de infecciones el primer año  | Creatinina el décimo año                |
| Número de rechazos con deterioro hemodinámico                                 | Hipertensión                         | Estado vital                            |
| Número de rechazos tratados con plasmaféresis                                 | Número de fármacos para la HTA       | Fecha del fallecimiento o seguimiento   |
| Enfermedad vascular del injerto (técnica diagnóstica y fecha del tratamiento) | Complicaciones neurológicas          | Causa inicial y final del fallecimiento |
|                                                                               | Complicaciones óseas                 |                                         |
|                                                                               | Otras complicaciones                 |                                         |
|                                                                               | Diálisis                             |                                         |

CMV: citomegalovirus; FEVI: fracción de eyección del ventrículo izquierdo; GOT (ASAT): glutamato-piruvato transaminasa; GPT (ALAT): gamma glutamil transpeptidasa; HTA: hipertensión arterial; PCR: parada cardiorrespiratoria; UCI: unidad de cuidados intensivos.

**Tabla 2 del material adicional**

Ajuste univariado de Cox para el desenlace muerte

| Variable                                         | HR   | IC95% |      | p       |
|--------------------------------------------------|------|-------|------|---------|
| Sexo del receptor                                | 0,88 | 0,80  | 0,95 | 0,003   |
| IMC del receptor                                 | 1,02 | 1,01  | 1,03 | < 0,001 |
| Bilirrubina $\geq$ 2 mg/dl antes del TxC         | 1,08 | 0,99  | 1,18 | 0,101   |
| GOT o GPT $\geq$ 40 mg/dl en la última analítica | 1,00 | 0,92  | 1,09 | 0,985   |
| Infección previa                                 | 1,13 | 1,01  | 1,27 | 0,026   |
| Patrón respiratorio obstructivo                  | 1,16 | 1,05  | 1,29 | 0,005   |
| Hipercolesterolemia                              | 1,04 | 0,97  | 1,12 | 0,292   |
| Tratamiento con amiodarona                       | 1,03 | 0,94  | 1,12 | 0,565   |
| Sexo del donante                                 | 1,07 | 1,00  | 1,15 | 0,068   |
| IMC del donante                                  | 1,00 | 0,99  | 1,01 | 0,494   |
| Parada cardiorrespiratoria del donante           | 0,87 | 0,74  | 1,03 | 0,105   |
| Días en UCI del donante                          | 1,00 | 0,99  | 1,00 | 0,698   |
| Causas de defunción del donante                  |      |       |      |         |
| Traumatismo frente a cerebrovascular             | 0,92 | 0,85  | 0,99 | 0,019   |
| Otras frente a cerebrovascular                   | 0,85 | 0,75  | 0,96 | 0,010   |
| Técnica quirúrgica                               | 0,89 | 0,83  | 0,95 | 0,001   |
| Inducción tras el trasplante                     | 0,67 | 0,62  | 0,73 | < 0,001 |
| Infección protozoaria                            | 1,10 | 0,79  | 1,53 | 0,580   |
| Infección no filiada                             | 0,85 | 0,77  | 0,94 | 0,003   |
| Diálisis                                         | 2,63 | 2,36  | 2,93 | < 0,001 |

GOT (ASAT): glutamato-piruvato transaminasa; GPT (ALAT): gamma glutamil transpeptidasa; IMC: índice de masa corporal; TxC: trasplante cardiaco; UCI: unidad de cuidados intensivos.

## Anexo del material adicional

### Centros participantes y colaboradores

| Hospital                                                      | Colaboradores                                                                                                                    |
|---------------------------------------------------------------|----------------------------------------------------------------------------------------------------------------------------------|
| Hospital Universitari i Politècnic La Fe, Valencia            | Ignacio Sánchez-Lázaro, Luis Martínez Dolz, Mónica Cebrián Pinar, Soledad Martínez Penadés                                       |
| Complejo Hospitalario Universitario de A Coruña, A Coruña     | María J. Paniagua-Martín, Eduardo Barge-Caballero, Gonzalo Barge-Caballero, David Couto-Mallón                                   |
| Hospital Universitario Puerta de Hierro, Madrid               | Manuel Gómez-Bueno, Francisco Hernández-Pérez                                                                                    |
| Hospital Universitario Marqués de Valdecilla, Santander       | Miguel Llano-Cardenal, José A. Vázquez de Prada, Francisco Nistal-Herrera                                                        |
| Hospital Universitario 12 de Octubre, Madrid                  | Eulalia Roig Minguell, Laura Morán-Fernández, Zorba Blázquez                                                                     |
| Hospital Universitario Reina Sofía, Córdoba                   | Amador López-Granados, Carmen Segura-Saintgerons, Dolores Mesa, Martín Ruiz, Elías Romo, Francisco Carrasco, José López-Aguilera |
| Hospital General Universitario Gregorio Marañón, Madrid       | María Jesús Valero, Juan Fernández-Yáñez, Paula Navas, Carlos Ortiz, Adolfo Villa, Eduardo Zatarain                              |
| Hospital Universitario Virgen del Rocío, Sevilla              | Diego Rangel-Sousa, Antonio Grande Trillo, Inés Sayago Silva                                                                     |
| Hospital de la Santa Creu i Sant Pau, Barcelona               | Vicens Brossa-Loidi, Sonia Mirabet-Pérez, Laura López-López                                                                      |
| Hospital Universitari de Bellvitge, L'Hospitalet de Llobregat | Nicolás Manito-Lorite, Carles Díez-López, Josep Roca-Elías                                                                       |
| Hospital Clínic i Provincial, Barcelona                       | María Ángeles Castel, Marta Farrero, Ana García-Álvarez                                                                          |

|                                                         |                                                                                 |
|---------------------------------------------------------|---------------------------------------------------------------------------------|
| Hospital Universitario Central de Asturias, Oviedo      | José Luis Lambert-Rodríguez, Beatriz Díaz-Molina, María José Bernardo-Rodríguez |
| Hospital Universitario Miguel Servet, Zaragoza          | Ana Pórtoles-Ocampo, Marisa Sanz-Julve                                          |
| Hospital Clínico Universitario, Valladolid              | Javier Tobar-Ruiz, Ana María Correa-Fernández                                   |
| Hospital Universitario Virgen de la Arrixaca, El Palmar | Domingo Pascual Figal                                                           |
